# Supplementary material
Source: Springer Nature journal article supplement (https://www.springermedizin.de/resource/supplementary/12943_2014_1443_MOESM2_ESM.pdf/9553026)
Supplement: MOESM2 [file 9553026]

**The integral optical density on immunocytochemical staining with anti-HE4 and anti-ANXA2 antibody**

| <b>IOD</b>       | <b>HE4</b>    | <b>ANXA2</b>  |
|------------------|---------------|---------------|
| ES-2-HE4-H       | 160.241±1.465 | 150.3±0.94    |
| ES-2-HE4-mock    | 85.327±0.341  | 70.524±0.836  |
| ES-2-HE4-L       | 8.012±0.657   | 9.365±1.816   |
| CaoV-3-HE4-H     | 120.332±0.738 | 123.213±1.381 |
| CaoV-3-HE4-mock  | 64.125±0.008  | 56.125±0.298  |
| CaoV-3-HE4-L     | 7.321±0.573   | 6.259±0.263   |
| Negative Control | 0.015±0.006   | 0.016±0.005   |
